# Supplementary material for: Effects of Popular Diets without Specific Calorie Targets on Weight Loss Outcomes: Systematic Review of Findings from Clinical Trials
Source: MDPI journal article supplement (doi:10.3390/nu9080822), 2017-07-31
Supplement: s1 [file s1]

**Effects of Popular Diets Without Specific Calorie Targets on Weight Loss Outcomes:  
Systematic Review of Findings from Clinical Trials**

Stephen D. Anton, Ph.D.,<sup>1,2</sup> \* Azumi Hida, Ph.D.,<sup>1,3</sup> \* Kacey Heekin, B.A.,<sup>1</sup> Kristen Sowalsky, D.C.,<sup>4</sup> Christy Karabetian, M.S.,<sup>1,2</sup> Heather Mutchie, B.A.,<sup>1,5</sup> Christiaan Leeuwenburgh, Ph.D.,<sup>1</sup> Todd M. Manini, Ph.D.,<sup>1</sup> & Tracey E. Barnett, Ph.D.<sup>6</sup>

\* Contributed equally

**Search strategy**

Relevant articles, published before 30 September 2016, were identified through three electronic databases (PubMed, Cochrane Library (which included Cochrane Central Register of Controlled Trials (CENTRAL), Cochrane Database of Systematic Reviews (CDSR) and other reviews), and Web of Science). The following search terms were used.

Cochrane Library (Search Manager)

((weight AND diet) AND (overweight OR obesity) AND (clinical trial) AND (each diet name))

Web of Science (Advanced Search)\*

((TS=(weight AND diet) AND TS=(overweight OR obesity)) NOT TS=(rat OR mouse)) AND TS=(clinical trial) AND TS=(each diet name) AND English AND Article

\*TS means Topic.

### Estimated standard deviation

A number of studies reported only mean initial and mean final values in control and intervention groups with corresponding standard deviation. The mean change was calculated as the difference between mean final and mean initial, and the standard deviation as :

The square root of  $[(SD_{pre})^2 + (SD_{post})^2 - 2r(SD_{pre} \cdot SD_{post})]$ , where  $SD_{pre}$  was the standard deviation of the mean baseline outcome,  $SD_{post}$  was the standard deviation of the mean follow-up outcome, and  $r$  was the correlation between the baseline and follow-up values.

**Table S1.** Characteristics of selected articles.

| Author, year       | n   | Women<br>(%) | Completed<br>n (%) | Age<br>(mean<br>±SD)<br>(y) | Duration        | Forest<br>plot<br>(Mo) | BMI<br>(Baseline<br>mean±SD<br>or range)<br>(kg/m <sup>2</sup> ) | Weight<br>(Baseline<br>mean±SD)<br>(kg) |
|--------------------|-----|--------------|--------------------|-----------------------------|-----------------|------------------------|------------------------------------------------------------------|-----------------------------------------|
| <b>Atkins diet</b> |     |              |                    |                             |                 |                        |                                                                  |                                         |
| Foster, 2003,      | 33  | 64           | 20 (61)            | 44±9.4                      | 3,6,12<br>Mo    | 6, 12                  | 33.9±3.8                                                         | 98.7±19.5                               |
| Dansinger, 2005    | 40  | 53           | 21 (53)            | 47±12                       | 1,2,6,12<br>Mo  | 6, 12                  | 35±3.5,<br>27-42                                                 | 100±14                                  |
| McAuley, 2005      | 31  | 100          | 28(90)             | 45±7.4,<br>30-70            | 8,16,24w        | 6                      | 36.0±3.9,<br>>27                                                 | 96±10.8                                 |
| Truby, 2006        | 57  | 74           | 9 (16)             | 40.9±9.7,<br>18-65          | 2,6 Mo          | 6                      | 31.9±2.2,<br>27-40                                               | 90.3±12.7                               |
| Gardner, 2007      | 77  | 100          | 68 (88)            | 42±5,<br>25-50              | 2,6,12<br>Mo    | 6, 12                  | 32±4,<br>27-40                                                   | 86±13                                   |
| Shai, 2008         | 109 | 9            | 85 (78)            | 52±7,<br>40-65              | 6, 12, 24<br>Mo | 6, 12                  | 30.8±3.5,<br>>27                                                 | 91.8±14.3                               |
| Davis, 2009        | 55  | 82           | 47 (85)            | 54±6,<br>>18                | 3, 6, 12<br>Mo  | 6, 12                  | 35±6,<br>≥25                                                     | 93.6±18                                 |

|                            |     |     |         |                     |                     |       |                    |            |
|----------------------------|-----|-----|---------|---------------------|---------------------|-------|--------------------|------------|
| Foster, 2010               | 153 | 67  | 68 (58) | 46.2±9.2,<br>18-65  | 3, 6, 12 ,<br>24 Mo | 6, 12 | 36.1±3.6,<br>30-40 | 103.3±15.5 |
| Yancy, 2010                | 72  | 28  | 57 (79) | 52.9±10.2,<br>18-70 | 24, 48 w            | 6, 12 | 39.9±6.9,<br>≥27   | 123.1±25.4 |
| Summer, 2011               | 42  | 100 | 39 (93) | 44.5±9.1,<br>≥18    | 6 Mo                | 6     | 33.2±2.6,<br>30-35 | 90.4±9.1   |
| <b>DASH diet</b>           |     |     |         |                     |                     |       |                    |            |
| Blumenthal, 2010,          | 46  | 63  | 44 (96) | 51.8±10<br>≥35      | 4 Mo                | 4     | 32.8±3.4,<br>25-40 | 93.0±14    |
| <b>Glycemic Index diet</b> |     |     |         |                     |                     |       |                    |            |
| Ebbeling, 2007             | 36  | 81  | 28 (78) | 28.2±3.8,<br>18-35  | 6,12,18<br>Mo       | 6, 12 | ≥30                | 103.5±17.3 |
| Melanson, 2012             | 59  | 88  | -       | 39.1±7.1,<br>25-50  | 12 w                | 3     | 31.1±2.5,<br>27-35 | 84.3±12.4  |
| <b>Mediterranean diet</b>  |     |     |         |                     |                     |       |                    |            |
| Elhayany, 2010             | 89  | 44  | 63 (71) | 57.4±6.1<br>30-65   | 3,6,9,12<br>Mo      | 12    | 31.1±2.8,<br>27-34 | 85.5±10.6  |
| Austel, 2015               | 100 | 79  | 72 (72) | 52.4±0.9            | 12 w                | 3     | 30.1±0.3           | 85.1±1.2   |
| <b>Ornish diet</b>         |     |     |         |                     |                     |       |                    |            |
| Dansinger, 2005            | 40  | 43  | 20 (50) | 49±12               | 1,2,6,12<br>Mo      | 6, 12 | 35±3.9             | 103±15     |
| Gardner, 2007              | 76  | 100 | 59 (78) | 42±6,<br>25-50      | 2,6,12<br>Mo        | 6, 12 | 32±3,<br>27-40     | 86±10      |
| <b>Paleolithic diet</b>    |     |     |         |                     |                     |       |                    |            |
| Mellberg, 2014             | 35  | 100 | 27 (77) | 59.5±5.5            | 6,24 Mo             | 6, 24 | 32.7±3.6,<br>≥27   | 87.0±10.6  |
| <b>Zone diet</b>           |     |     |         |                     |                     |       |                    |            |
| Dansinger, 2005            | 40  | 50  | 26 (65) | 51±9                | 1,2,6,12<br>Mo      | 6, 12 | 34±4.5             | 99±18      |

|               |    |     |         |                  |              |       |                 |           |
|---------------|----|-----|---------|------------------|--------------|-------|-----------------|-----------|
| McAuley, 2005 | 30 | 100 | 29 (97) | 47±7.9,<br>30-70 | 24w          | 6     | 34.5±5.3<br>>27 | 93.2±14.5 |
| Gardner, 2007 | 79 | 100 | 61 (77) | 40±6,<br>25-50   | 2,6,12<br>Mo | 6, 12 | 31±3,<br>27-40  | 84±12     |

w=weeks, Mo=month.

Anton SD, et al.

**Table S2.** Assessment on the risk of bias.

| Author (year)   | Random sequence generation (selection bias) | Allocation concealment (selection bias) | Binding of participants and personnel (performance bias) | Binding of outcome assessment (detection bias) | Incomplete outcome data (attrition bias) | Selective reporting (reporting bias) | Other bias (control diet) | Diet group                                                             |
|-----------------|---------------------------------------------|-----------------------------------------|----------------------------------------------------------|------------------------------------------------|------------------------------------------|--------------------------------------|---------------------------|------------------------------------------------------------------------|
| Foster, 2003    | Low                                         | Low                                     | Unclear                                                  | Low                                            | Low                                      | Low                                  | High                      | Atkins, and High-carbohydrate low-fat energy-deficit Conventional diet |
| Dansinger, 2005 | Low                                         | Low                                     | Low                                                      | Low                                            | Low                                      | Low                                  | High                      | Atkins, Ornish, Zone, and Weight Watchers diet                         |
| McAuley, 2005   | Low                                         | Low                                     | Unclear                                                  | Low                                            | Unclear                                  | Low                                  | High                      | Atkins, Zone, and Conventional High-carbohydrate high-fiber diet       |
| Truby, 2006     | Low                                         | Low                                     | High                                                     | Low                                            | Low                                      | Low                                  | Low                       | Atkins, and Control diet                                               |
| Gardner, 2007   | Low                                         | Low                                     | Low                                                      | Low                                            | Low                                      | Low                                  | High                      | Atkins, Ornish, Zone, and LEARN (exercise included) diet               |
| Shai, 2008      | Low                                         | Low                                     | Unclear                                                  | Low                                            | Low                                      | Low                                  | High                      | Atkins, Modified Mediterranean, and Low-fat diet (as Reference diet).  |
| Davis, 2009     | Low                                         | Low                                     | Unclear                                                  | Low                                            | Unclear                                  | Unclear                              | High                      | Atkins, and Low-fat diet                                               |
| Foster, 2010    | Low                                         | Low                                     | Unclear                                                  | Low                                            | Low                                      | Low                                  | High                      | Atkins, and Low-fat diet                                               |

|                  |     |     |         |     |         |         |      |                                                                  |
|------------------|-----|-----|---------|-----|---------|---------|------|------------------------------------------------------------------|
| Yancy, 2010      | Low | Low | Unclear | Low | Unclear | Unclear | High | Atkins, and Atkins (calorie restricted) + Orlistat               |
| Summer, 2011     | Low | Low | Unclear | Low | Unclear | Unclear | High | Atkins, and Low-fat diet                                         |
| Blumenthal, 2010 | Low | Low | Unclear | Low | Low     | Low     | Low  | DASH, DASH-weight Management (CR and Ex) diet, and Usual care    |
| Ebbeling, 2007   | Low | Low | Unclear | Low | Low     | Low     | High | Glycemic Index, and Low-fat diet                                 |
| Melanson, 2012   | Low | Low | Unclear | Low | Unclear | Unclear | High | Glycemic Index, and Low energy density, and Portion control diet |
| Elhayany, 2010   | Low | Low | Unclear | Low | Unclear | Unclear | Low  | Mediterranean, ADA, and Low-carbohydrate Mediterranean diet      |
| Austel, 2015     | Low | Low | Unclear | Low | Low     | Low     | Low  | Mediterranean, and Control diet (waiting list)                   |
| Mellberg, 2014   | Low | Low | Unclear | Low | Low     | Low     | Low  | Paleolithic, and Nordic Nutrition Recommendations (NNR) diet     |

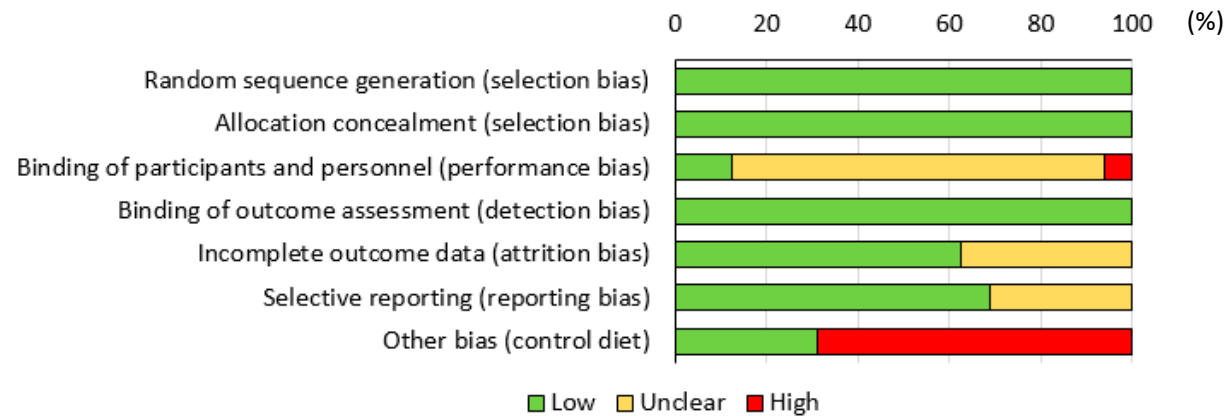

Figure S1. Summary of study-level risk of bias assessment.
